# Supplementary material
Source: publisher site journal article supplement (https://www.dovepress.com/article/542278)
Supplement: Supplementary file 1 [file 542278%20Revised%20Supplementary%20Material.docx]

Supplementary Material

**Table S1. Ingredients that make up the oxidative balance score.**

| **OBS components** | **Property** | **0** | **1** | **2** |
| --- | --- | --- | --- | --- |
| **Dietary OBS** |  |  |  |  |
| Dietary fiber(g/d) | A | < 11.5 | 11.5-17.45 | ≥ 17.45 |
| Carotene (RE/d) | A | < 131.458 | 131.458-450.181 | ≥ 450.181 |
| Riboflavin (mg/d) | A | < 1.347 | 1.347-1.911 | ≥ 1.911 |
| Niacin (mg/d) | A | < 15.286 | 15.286-21.628 | ≥ 21.628 |
| Vitamin B6(mg/d) | A | < 1.257 | 1.257-1.835 | ≥ 1.835 |
| Total Folate (mcg/d) | A | < 251.333 | 251.333-366.5 | ≥ 366.5 |
| Vitamin B12(mcg/d) | A | < 2.43 | 2.43-4.185 | ≥ 4.185 |
| Vitamin C (mg/d) | A | < 43 | 43-92.233 | ≥ 92.233 |
| Vitamin E (ATE) (mg/d) | A | < 4.895 | 4.895-7.835 | ≥ 7.835 |
| Calcium (mg/d) | A | < 594 | 594-875 | ≥ 875 |
| Magnesium (mg/d) | A | < 204.5 | 204.5-284.167 | ≥ 284.167 |
| Zinc (mg/d) | A | < 6.885 | 6.885-9.878 | ≥ 9.878 |
| Copper (mg/d) | A | < 0.828 | 0.828-1.181 | ≥ 1.181 |
| Selenium (mcg/d) | A | < 70.533 | 70.533-99.75 | ≥ 99.75 |
| Total fat (gm/d) | P | ≥ 71.688 | 48.533-71.688 | < 48.533 |
| Iron (mg/d) | P | ≥ 13.265 | 9.275-13.265 | < 9.275 |
| **Lifestyle OBS** |  |  |  |  |
| Cotinine(ng/mL) | P | ≥ 0.059 | 0.011-0.059 | ≤ 0.011 |
| Alcohol(g/d) | P | ≥15 | 0-15 | 0 |
| Body mass index(kg/m2) | P | ≥30 | 25-30 | <25 |
| Physical activity  (MET-minutes/week) | A | <600 | 600-3000 | ≥3000 |

**Notes:** The "Property" column indicates whether a component is an antioxidant (A) or a pro-oxidant (P).

**Abbreviations:** RE, retinal equivalent; ATE, alpha-tocopherol equivalent; MET, metabolic equivalent of task.

**Table S2. The definition of the other comorbities.**

**Diabetes**

1) Medical diagnosis of diabetes as recorded by the patient’s healthcare provider or current use of insulin or diabetic pills.

2) or glycohemoglobin A1c (HbA1c) level higher than 6.5%.

3) or fasting blood glucose level equal to or higher than 7.0 mmol/L.

4) or random blood glucose level equal to or higher than 11.1 mmol/L.

**Hypertension**

1) average systolic blood pressure ≥140 mmHg or average diastolic blood pressure ≥90 mmHg by the mean value of at least three times of measurement

2) or use of anti-hypertensive medications

3) or self-reported diagnosis of hypertension.

**Hyperlipidemia**

1) Triglyceride levels equal to or greater than 150 mg/dL

2) or hypercholesterolemia:

a. TC levels equal to or greater than 200 mg/dL,

b. or LDL-C levels equal to or greater than 130 mg/dL,

c. or HDL-C levels less than 40 mg/dL for males and less than 50 mg/dL for females.

**Cardiovascular diseases (CVDs)**

congestive heart failure, coronary heart disease, heart attack, angina, or stroke.

**Table S3. Additional baseline characteristics based on the presence or absence of Premature Menopaose.**

| **Characteristic** | **Premature Menopaose** | | | ***p*-value** |
| --- | --- | --- | --- | --- |
| **Overall, N = 33,238,9281** | **Non-Premature Menopaose Weighted N = 29,245,402 Unweighted n = 3,6171** | **Premature Menopaose Weighted N = 3,993,526 Unweighted n = 5111** |
| **Total OBS** | 22 (16, 27) | 22 (16, 27) | 19 (13, 25) | <0.0011 |
| **Dietary OBS** | 17 (12, 23) | 18 (12, 23) | 15 (9, 21) | <0.0011 |
| **Lifestyle OBS** | 4.00 (3.00, 5.00) | 4.00 (3.00, 5.00) | 4.00 (3.00, 5.00) | 0.0331 |
| **Energy(kcal)** | 1,663 (1,328, 2,049) | 1,672 (1,341, 2,058) | 1,595 (1,265, 2,000) | 0.0721 |
| **Race** |  |  |  | 0.0222 |
| Non-Hispanic White | 1,896 (74.0%) | 1,675 (74.6%) | 221 (70.2%) |  |
| Mexican American | 585 (5.7%) | 506 (5.5%) | 79 (6.9%) |  |
| Non-Hispanic Black | 781 (8.7%) | 652 (8.2%) | 129 (12.9%) |  |
| Other Race | 866 (11.6%) | 784 (11.8%) | 82 (10.0%) |  |
| **Marital Status** |  |  |  | <0.0012 |
| Married or living with partner | 2,102 (60.6%) | 1,857 (61.2%) | 245 (56.0%) |  |
| Widowed or Divorced or Separated | 1,650 (32.9%) | 1,480 (33.6%) | 170 (27.5%) |  |
| Never married | 374 (6.5%) | 278 (5.1%) | 96 (16.5%) |  |
| Missing | 2 (0.0%) | 2 (0.0%) | 0 (0.0%) |  |
| **Education** |  |  |  | 0.0102 |
| Below high school | 1,044 (15.2%) | 903 (14.8%) | 141 (17.9%) |  |
| High school | 995 (25.9%) | 862 (24.9%) | 133 (33.2%) |  |
| Above high school | 2,085 (58.9%) | 1,848 (60.3%) | 237 (48.9%) |  |
| Missing | 4 (0.0%) | 4 (0.0%) | 0 (0.0%) |  |
| **Poverty Ratio** |  |  |  | <0.0012 |
| ≤ 1.3 | 1,157 (17.9%) | 950 (16.0%) | 207 (31.4%) |  |
| (1.3, 3.5] | 1,386 (31.4%) | 1,234 (31.9%) | 152 (27.4%) |  |
| ＞3.5 | 1,175 (43.3%) | 1,065 (44.4%) | 110 (35.5%) |  |
| Missing | 410 (7.4%) | 368 (7.6%) | 42 (5.7%) |  |
| **Diabetes** |  |  |  | 0.0992 |
| Yes | 1,005 (17.8%) | 893 (18.3%) | 112 (14.4%) |  |
| No | 3,123 (82.2%) | 2,724 (81.7%) | 399 (85.6%) |  |
| **Hypertension** |  |  |  | <0.0012 |
| Yes | 1,085 (22.1%) | 985 (23.2%) | 100 (13.8%) |  |
| No | 3,043 (77.9%) | 2,632 (76.8%) | 411 (86.2%) |  |
| **Hyperlipidemia** |  |  |  | 0.4412 |
| Yes | 3,009 (73.1%) | 2,648 (72.9%) | 361 (74.9%) |  |
| No | 1,106 (26.7%) | 956 (26.9%) | 150 (25.1%) |  |
| Missing | 13 (0.2%) | 13 (0.2%) | 0 (0.0%) |  |
| **CVD** |  |  |  | 0.3382 |
| Yes | 542 (11.1%) | 464 (10.8%) | 78 (13.0%) |  |
| No | 3,586 (88.9%) | 3,153 (89.2%) | 433 (87.0%) |  |
| **Menarche** |  |  |  | 0.8312 |
| Normal Menarche | 2,590 (64.8%) | 2,287 (65.2%) | 303 (62.0%) |  |
| Early Menarche | 822 (19.6%) | 706 (19.3%) | 116 (21.4%) |  |
| Late Menarche | 686 (14.6%) | 600 (14.5%) | 86 (15.7%) |  |
| Missing | 30 (1.0%) | 24 (1.0%) | 6 (0.9%) |  |
| **Live Birth Count** |  |  |  | <0.0012 |
| 0 | 134 (4.0%) | 122 (4.2%) | 12 (2.5%) |  |
| 1 | 566 (16.4%) | 469 (15.1%) | 97 (26.5%) |  |
| 2 | 1,086 (31.1%) | 955 (32.0%) | 131 (24.7%) |  |
| ≥3 | 1,969 (38.5%) | 1,767 (39.3%) | 202 (32.4%) |  |
| Missing | 373 (10.0%) | 304 (9.5%) | 69 (13.9%) |  |
| 1 Wilcoxon rank-sum test for complex survey samples | | | | |
| 2 Chi-squared test with Rao & Scott's second-order correction | | | | |

**Table S4. Sensitivity Analysis of the Association Between Total OBS and PM by Sequentially Excluding Each Component.**

| OBS component  excluded | OR | CI | *p* value |
| --- | --- | --- | --- |
| Dietary fiber | 0.96 | 0.93- 0.99 | 0.0111 |
| Carotene | 0.97 | 0.94-0.99 | 0.0235 |
| Riboflavin | 0.96 | 0.93-0.99 | 0.0077 |
| Niacin | 0.96 | 0.93- 0.98 | 0.0036 |
| Vitamin B6 | 0.95 | 0.92-0.98 | 0.0038 |
| Total Folate | 0.96 | 0.93-0.99 | 0.0148 |
| Vitamin B12 | 0.96 | 0.93-0.98 | 0.0036 |
| Vitamin C | 0.96 | 0.93-0.99 | 0.0148 |
| Vitamin E | 0.96 | 0.93-0.99 | 0.0074 |
| Calcium | 0.96 | 0.93-0.99 | 0.0079 |
| Magnesium | 0.96 | 0.93-0.99 | 0.0128 |
| Zinc | 0.96 | 0.93-0.99 | 0.0051 |
| Copper | 0.96 | 0.93-0.99 | 0.0124 |
| Selenium | 0.96 | 0.93-0.99 | 0.0058 |
| Total fat | 0.96 | 0.93-0.99 | 0.0071 |
| Iron | 0.96 | 0.94-0.99 | 0.0077 |
| Cotinine | 0.97 | 0.94-0.99 | 0.0206 |
| Alcohol | 0.96 | 0.93-0.99 | 0.0039 |
| Body mass index | 0.96 | 0.93-0.99 | 0.0042 |
| Physical activity | 0.96 | 0.93-0.99 | 0.0055 |

**Abbreviations:** CI, Confidence Interval; OR, Odds Ratio.

**Table S5. Performance and Validation of the Final Multivariable Logistic Regression Model.**

| Performance Metric | Value |
| --- | --- |
| *Overall Performance* |  |
| Weighted Brier Score | 0.0974 |
| *Discrimination* |  |
| AUC (95% CI) | 0.661 (0.627–0.695) |
| *Calibration* |  |
| Calibration Intercept (95% CI) | 0.00 (-0.25–0.25) |
| Calibration Slope (95% CI) | 1.00（0.87–1.13) |
| Coverage across deciles | 70% |

**Abbreviations:** AUC, Area Under the Curve; CI, Confidence Interval.
